## Functional properties of bone marrow derived multipotent mesenchymal stromal cells are altered in heart failure patients, and could be corrected by adjustment of expansion strategies

Renata I. Dmitrieva<sup>1</sup>, Alla V. Revittser<sup>1,2</sup>, Maria A. Klukina<sup>1</sup>, Yuri V. Sviryaev<sup>1</sup>, Ludmila S. Korostovtseva<sup>1</sup>, Anna A. Kostareva<sup>1</sup>, Andrey Yu. Zaritskey<sup>1</sup>, and Evgeny V. Shlyakhto<sup>1</sup>

<sup>1</sup> Federal Almazov Medical Research Centre, St. Petersburg, Russia

<sup>2</sup> St. Petersburg State Polytechnical University, Branch of Medical Physics and Bioengineering, Russia

**Key words:** heart failure, bone marrow multipotent mesenchymal stromal cells, proliferation, differentiation, myofibroblasts, natriuretic peptides system, senescence, hypoxia, cell therapy

**Received:** 06/10/14; **Accepted:** 01/07/15; **Published:** 01/09/15

**Correspondence to:** Renata I. Dmitrieva, PhD; **E-mail:** [renata.i.dmitrieva@gmail.com](mailto:renata.i.dmitrieva@gmail.com)

**Copyright:** Dmitrieva et al. This is an open-access article distributed under the terms of the Creative Commons Attribution License, which permits unrestricted use, distribution, and reproduction in any medium, provided the original author and source are credited

**Abstract:** Background: Bone marrow multipotent mesenchymal stromal cells (BM-MMSC) considered as a prospective substrate for cell therapy applications, however adult stem cells could be affected by donor-specific factors: age, gender, medical history. Our aim was to investigate how HF affects the functional properties of BM-MMSC. Materials and methods: BM-MMSC from 10 healthy donors (HD), and 16 donors with chronic HF were evaluated for proliferative activity, ability to differentiate, replicative senescence, expression of genes that affect regeneration and fibrosis. The effect of culturing conditions on efficiency of BM-MMSC expansion was determined. Results: HF-derived BM-MMSC demonstrated early decrease of proliferative activity and upregulation of genes that control both, regeneration and fibrosis: Tgf- $\beta$  pathway, synthesis of ECM, remodeling enzymes, adhesion molecules. We assume that these effects were related to increase of frequency of myofibroblast-like CD146+/SMA $\alpha$ + CFU-F in HF samples; (ii) low seeding density and hypoxia resulted in predominant purification and expansion of CD146+/SMA $\alpha$ - CFU-Fs. (iii) the activity of NP system was downregulated in HF BM-MMSC; Conclusions: downregulation of NP signaling in combination with upregulation of Tgf- $\beta$  pathway in BM-MMSC would result in pro-fibrotic phenotype and make these cells non-effective for therapeutic applications; the corrections in culturing strategy resulted in  $2^3$ - $2^7$  increase of expansion efficiency.

### INTRODUCTION

Chronic heart failure (HF) is one of the most common causes of death worldwide, and the only radical treatment for severe chronic HF remains to be heart transplantation. However, in many cases the transplantation is not a solution due to the limited availability of donors, high cost and problems associated with immunosuppression [1]. Therefore, it is necessary to search for new therapeutic approaches to restore the structure and function of cardiac muscle. In the past two decades cell therapy has been considered as the prospective therapeutic approach to the treatment of cardiovascular diseases including HF [1-9].

The cells intended for cell therapy must have certain characteristics: they should be relatively easy available, safe, and demonstrate efficiency in stimulation of repair of cardiac muscle [8]. Different cell types were tested in regeneration protocols: multipotent mesenchymal stromal cells from bone marrow and adipose tissue, bone marrow mononuclear cells, skeletal muscle myoblasts, fetal cardiomyocytes, fibroblasts, and others [2, 8, 10-12]. By now BM-MMSC remain to be the most attractive, and one of the best characterized substrates for clinical applications: these cells could be rapidly and efficiently expanded in vitro and this type of cells is known to be immunologically privileged. The latter makes possible to consider BM-MMSC for

allogeneic transplantation [13-17]. Though there are clinical evidence that the low immunogenicity of MMSC enables the use of allogeneic MMSC transplantation [18], many researchers still believe that the ideal substrate for cell therapy are autologous cells [7, 8]. However, it was demonstrated in several animal-based studies that donor-specific factors could attenuate stem cell functions and reduce regenerative potential [19][20]. Influence of donor's age and gender on the properties of BM-MMSC has been studied actively in recent years in many laboratories [19-24], but the studies of impact of chronic cardiovascular disorders, including HF, on multipotent progenitor cells are limited [24-27]. In the present work the direct impact of HF on functional properties of BM-MMSC was estimated, and the possibilities to compensate for these effects by correcting ex vivo expansion strategies of BM-MMSC were studied.

## RESULTS

### BM-MMSC characterization

All cells used in this project were analyzed routinely for expression of stromal cell-associated markers CD105, CD90, CD166 and CD73 and for hematopoietic lineage

cells markers CD34, CD19, CD45 to make sure that cells meet minimal criteria for defining multipotent mesenchymal stromal cells [12]. All BM-MMSC samples were CD105/CD90/CD166/CD73 positive and negative for CD34/CD19/CD45 at all tested passages. Additionally, the ability of BM-MMSC to differentiate to osteo- and adipo- lineages was tested. Representative images are demonstrated on Figure 1.

### BM-MMSC proliferative activity

Proliferative activity is an important feature of cell samples that intended for therapeutic protocols. The decline in proliferative activity could indicate that cells either enter the state of replicative senescence [28, 29] or they just stop growing and begin to differentiate [30]. To estimate the proliferative activity in BM-MMSC we calculated population doubling time (PD) for each sample in successive passages, and found out that at the first steps of in vitro expansion PD was less than 24 h in practically all tested samples, but increased gradually during expansion, and could reach more than 7 days by P3. The significant difference in proliferative activity between HD and HF samples was detected after about 14 in vitro doublings (Figure 2A).

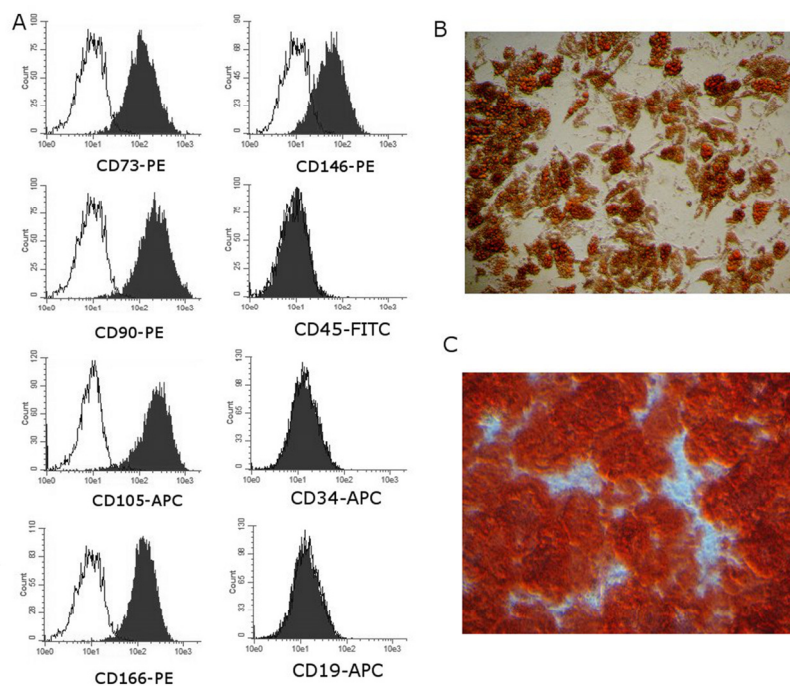

**Figure 1. Representative results of routine analysis of BM-MMSC samples quality.** (A) Immunophenotype; Performed on Guava EasyCyte 8 using ExpressPro software. (B,C) Ability to differentiate: (B) Adipogenic differentiation (x200, OilRedO staining) and (C) osteogenic differentiation (x200, Alizarin staining).

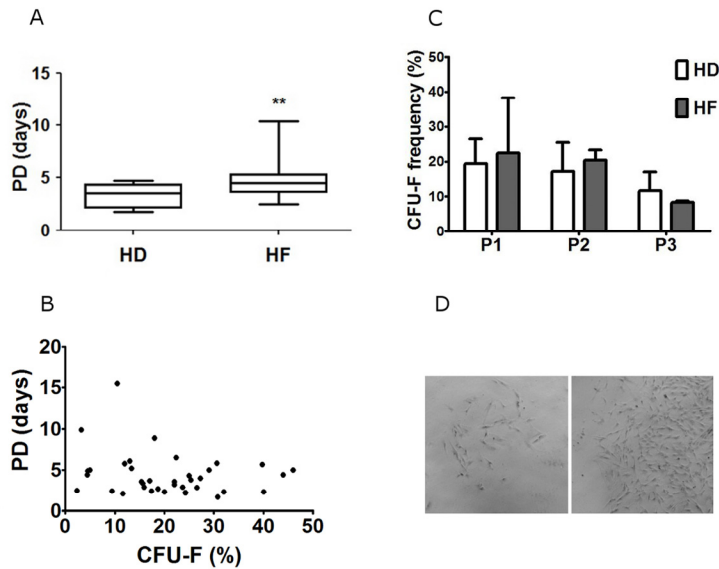

**Figure 2. Analysis of in vitro proliferation activity of HD and HF BM-MMSC cells seeded at 3000 cells/cm<sup>2</sup> and expanded in normoxia (pO<sub>2</sub> =20%). (A)** The population doubling time (PD) at passage 3; Data are presented as mean  $\pm$  SEM; n=16 for HF, and n=10 for HD; \*\* p <0.03; **(B)** CFU-F frequency in BM-MMSC samples at successive passages; Data are presented as mean  $\pm$  SEM; n=5. **(C)** The correlation analysis between CFU-F frequency and PD in BM-MMSC samples; **(D)** BM-MMSC CFU with low (left panel) and high (right panel) proliferation rate; (x50).

### Dynamics of CFU-F frequency during expansion

The frequency of CFU-F in sample is another common indicator of BM-MMSC proliferative activity. Surprisingly, we did not find the significant difference in CFU-F frequency between HD and HF (Figure 2B). Furthermore, the correlation between CFU-F and PD was not observed in our samples (Figure 2C), which means that slow and fast proliferating BM-MMSC samples differ not in frequency of CFU-Fs, but rather in functional properties of CFU-Fs. Indeed, it was clear, that the properties of different CFU-Fs in every particular sample were not identical: in all samples we were able to observe two different kinds of colonies: small, slow proliferating, and large, rapidly proliferating CFU-Fs. “Fast” colonies demonstrated high proliferation rate and high cellular density (small distance between cells in colony, that indicates low migratory capacity). Cells in “slow” colonies had large nuclei, were larger in size, than in “fast” colonies, did not proliferate actively, and demonstrated higher distance between cells, indicating increase in migratory activity (Figure 2D). In both types of colonies cells were positive for CD146 (Figure 3), the adhesion molecule which is considered as one of putative

markers of multipotency in mesenchymal stromal cells [28, 31]. Additionally, cells in “slow” colonies were positive for quite well-organized SMA $\alpha$  filaments, which suggest initiation of BM-MMSC-to-myofibroblasts differentiation process (Figure 3).

Unfortunately, the method we used here to estimate the CFU-F frequency in BM-MMSC samples does not allow distinguish between “slow” and “fast” CFU-Fs. However, since the decrease in PD was not accompanied by decrease in frequency of total (“slow” plus “fast”) CFU-Fs in HF-derived samples, we hypothesized that the decrease in proliferation rate in HF-derived BM-MMSC is an indicator of increased frequency of slow proliferating, SMA $\alpha$ + myofibroblast-like CFU-Fs. The next part of our study was performed to test this assumption.

### Remodeling pathways are activated in BM-MMSC from HF patients

The differentiation of stromal cells/fibroblasts to myofibroblasts is an initial step in regulation of wound healing and tissue regeneration. These myofibroblasts proliferate in response to injury, express SMA $\alpha$ , secrete

and process extracellular matrix (ECM) proteins to form a scar or fibrosis [32-36]. We hypothesized that BM-MMSCs derived from HF patients were activated in vivo to differentiate into myofibroblast/myofibroblast-like cells in order to accelerate regeneration program, and this commitment affected proliferative activity of BM-MMSC during expansion in vitro. To test this hypothesis we compared the expression of key regulators of tissue remodeling and regeneration in HD and HF-derived BM-MMSC.

First, the screening of the expression of 84 key genes involved in tissue remodeling during the repair and healing was done using RT<sup>2</sup> Profiler PCR. The panel included genes that regulate different stages of both, tissue regeneration and fibrosis: inflammation, proliferation and remodeling. The results of screening revealed that virtually all genes presented on panel were upregulated in HF-derived samples (Figure 4A). Afterwards, the RT-PCR analysis of expression of individual genes was performed to verify RT<sup>2</sup> Profiler results. All genes selected for further analysis fall into three functional groups: Tgf-beta superfamily genes; extracellular matrix components and remodeling enzy-

mes; cellular adhesion molecules and regulators of epithelial-to-mesenchymal transition. The results of analysis are presented on Figure 4 (B-D): these results confirm our hypothesis that in HF-derived BM-MMSC samples the signaling pathways that regulate both, tissue repair and remodeling were activated at least at mRNA level, and provide a valuable background information for planning further research aimed to reveal the molecular networks that control BM-MMSC response/adaptation to chronic HF.

### The regulation of natriuretic peptide signaling system is altered in HF derived BM-MMSC

It is obvious that functional alterations in bone marrow cells derived from HF patients should be determined by systemic disease-specific mechanisms. HF is characterized by chronic activation of natriuretic peptides system: the secretion and circulation of cardiac natriuretic peptides (NPs) are markedly increased during HF. NPs system not only regulates diuresis, natriuresis and vasorelaxation, but also is essential for maintenance of normal cardiac architecture [37, 38].

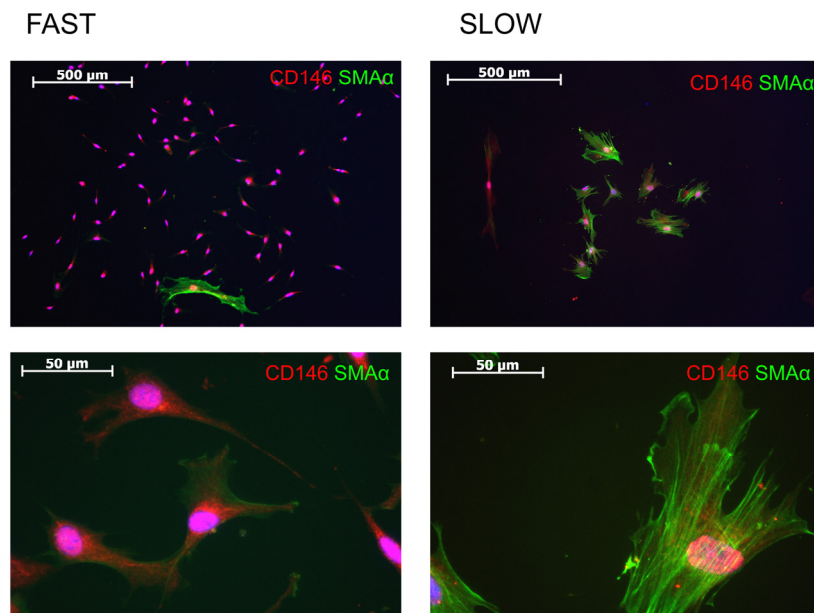

Figure 3. Analysis of expression of CD146 and SMA $\alpha$  in "slow" and "fast" CFU-Fs.

Furthermore, NPs receptors modulate cardiomyocyte proliferation during development [39], and participate in regulation of cardiac remodeling and regeneration [40-43]. We hypothesized, that the changes in regeneration-related functional properties of BM-MMSC in HF could be, at least in a part, the result of alterations in regulation of NPs system. The activity of NPs system is determined by the reciprocal control of clearance (NPRC) and signaling (NPRA/NPRB) receptors [44-46], therefore we tested if there are alterations in regulation of NPRC,

NPRA and NPRB receptors in HF-derived BM-MMSC. The results are demonstrated on Figure 5: the data are presented as the ratio of clearance receptor NPRC mRNA level to regulatory receptor (NPRA, NPRB) mRNA level. The downregulation of NPs system at mRNA level was demonstrated for HF-derived BM-MMSC, and these results are in a good accordance with previous data showing on experimental animal models that NP receptors could be downregulated in failing heart by high levels of their agonists [47-49].

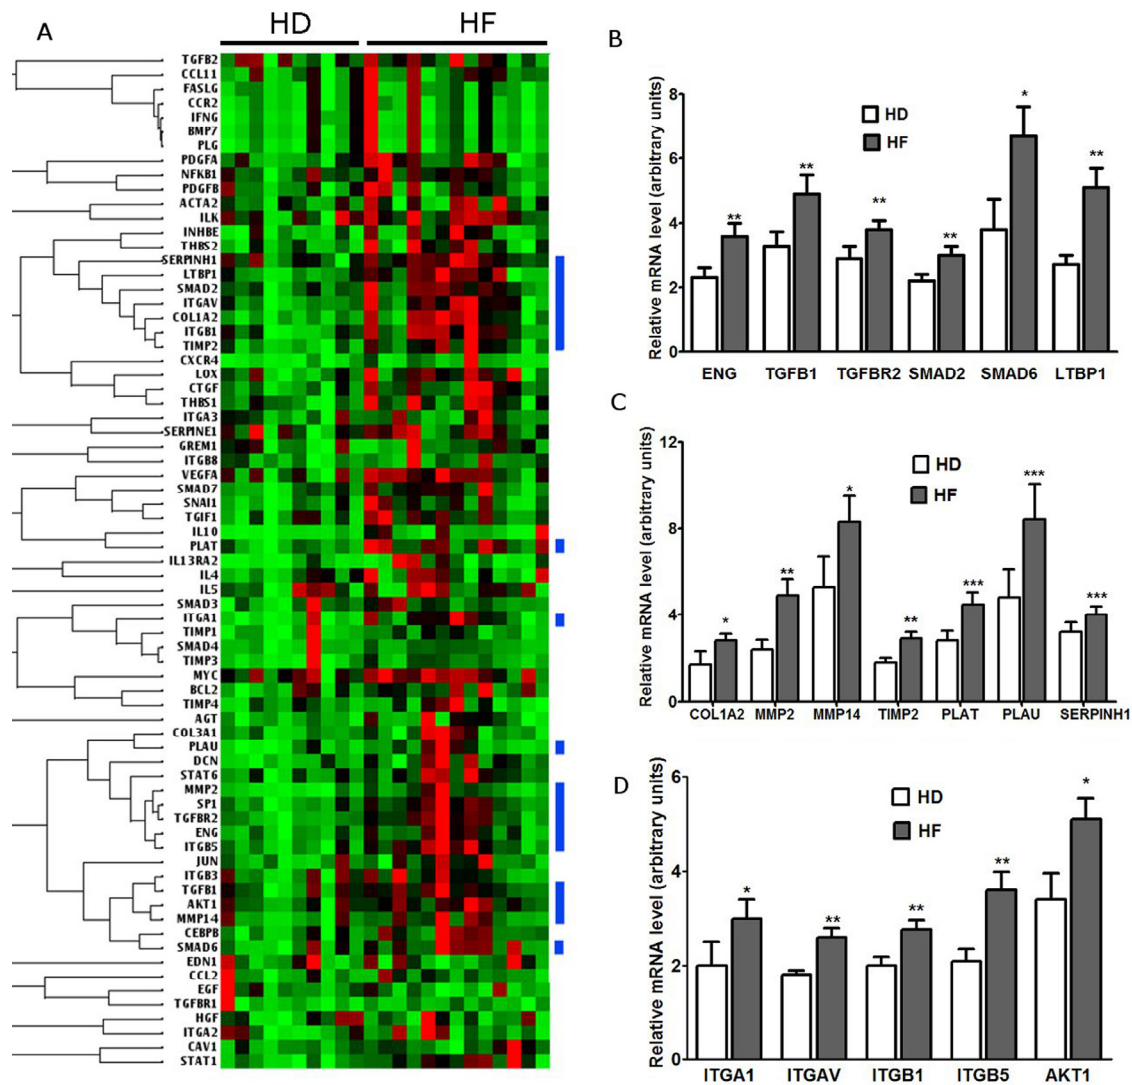

**Figure 4. Analysis of expression of genes that regulate regeneration and remodeling in BM-MMSC from HD and HF patients.** (A) Visualization of analysis of RT2-PCR expression array results: the blue color bars represent clusters of upregulated genes that control tissue regeneration at different levels; (B) Validation of upregulation of Tgf-beta superfamily genes in HF-derived BM-MMSC; n=10-16, \*p<0.02, \*\*p<0.01; (C) Validation of upregulation of extracellular matrix components and remodeling enzymes in HF-derived BM-MMSC; n=10-16; \*p<0.001, \*\*p<0.01, \*\*\*p<0.05; (D) Validation upregulation of cellular adhesion molecules and regulators of epithelial-to-mesenchymal transition in HF-derived BM-MMSC; n=10-16; \*p<0.02; \*\*p<0.002. All data are presented as mean +/- SEM.

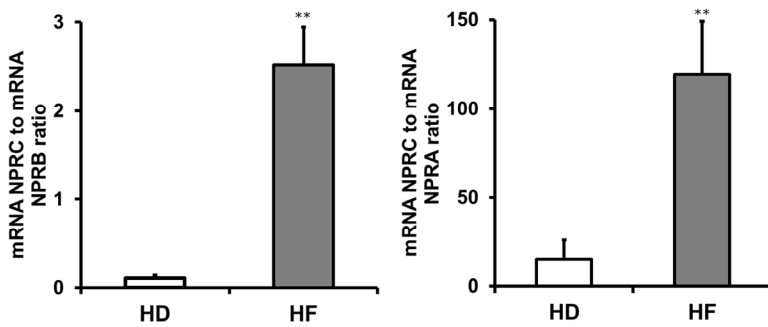

**Figure 5. The expression of regulatory receptors (NPRA, NPRB) of natriuretic peptides system is downregulated in HF-derived BM-MMSC.** n=4-5; \*\*p<0.02; Data presented as mean +/- SEM. NPRC is used as a reference gene.

### Culturing strategy affects the efficiency of BM-MMSC in vitro expansion

The early decrease in proliferative activity would be a serious obstacle in development of cell-based therapeutic protocols, therefore the next step in our study was aimed to estimate how to increase the efficiency of HF-derived BM-MMSC sample expansion in vitro by modifying the culturing strategy. The experimental approach was based on the assumption that each sample, including those with low proliferation rate, would still contain a fraction of “fast” colonies, and purification and expansion of this particular fraction would result in stabilization of proliferation activity of BM-MMSC sample in vitro. The true clonogenic/stem cells are capable of forming colonies of fibroblast-like cells at very low plating densities, and cell contacts would even inhibit cells growth. On the contrary, non-clonogenic/activated cells would need cell-to-cell contacts to survive [28]. Thus, we tested the possibility to increase the efficiency of expansion of BM-MMSC by reducing the seeding density from 3000 to 100 cells/cm<sup>2</sup> in order to provide the room for expansion of rapidly proliferating colonies and minimize the contact inhibition of growth [28]. Additionally, the effect of moderate hypoxia (pO<sub>2</sub>=5% instead of pO<sub>2</sub>=20%) on expansion efficiency was tested as described earlier [50].

The results of this set of experiments shown in Figure 6A: cells plated at seeding density 3000 cells/cm<sup>2</sup> under pO<sub>2</sub>=20% maintained high proliferative rate with no signs of replicative senescence only for up to 17,5 cumulative population doublings (median survival),

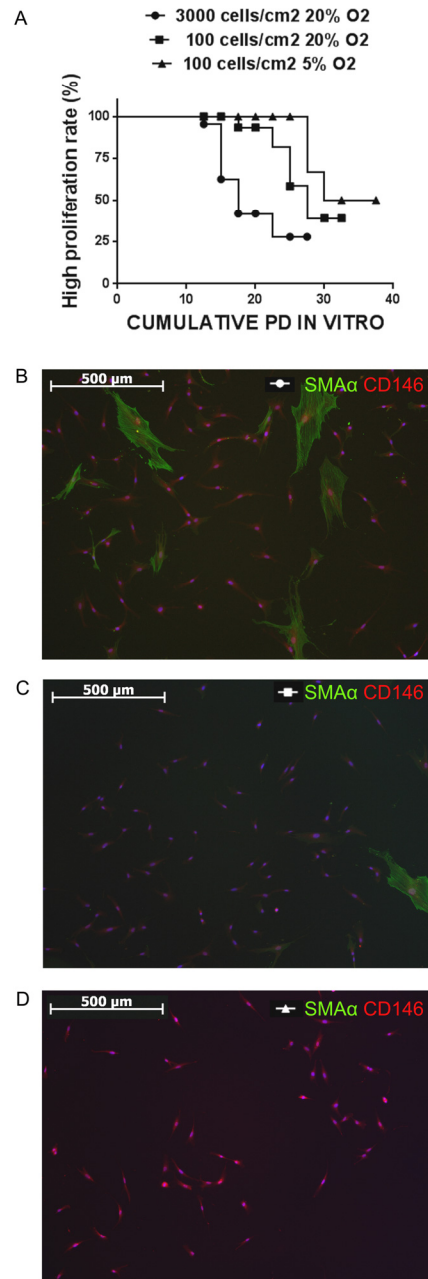

**Figure 6. Culturing strategy affects the phenotype of cellular population and the efficiency of in vitro expansion.** (A) Kaplan-Meier survival curves for analysis of proliferation rate during BM-MMSC expansion in vitro under different culture conditions. The log-rank tests confirmed the significant difference for each pair of culturing conditions (p<0,001). (○) n=43; (■) n=20; (▲) n=21. (B-D) The frequency of SMAα+ cells in cultures seeded at low density in both, normoxia and hypoxia is reduced compared to cultures seeded high density.

while at seeding density 100 cells/cm<sup>2</sup> under pO<sub>2</sub>=20% the median survival was 27,5 population doublings, and increased further up to 33,75 when cells were seeded at low density and cultured under moderate hypoxic conditions (pO<sub>2</sub>= 5%). Furthermore, the frequency of SMA $\alpha$ <sup>+</sup> cells in cultures seeded at low density in both, normoxia and hypoxia, was noticeably reduced compared to cultures seeded high density (Figure 6 B-D).

## DISCUSSION

In present work we have found that a number of properties were altered in BM-MMSC derived from HF patients compared to HD-derived BM-MMSC. In particular, in HF-derived BM-MMSC the decrease in proliferative activity during *in vitro* expansion was detected, accompanied by upregulation of signaling pathways that control both, tissue regeneration and fibrosis. We assume that decline in proliferative activity was related to increase of frequency of “slow” myofibroblast-like CD146<sup>+</sup>/SMA $\alpha$ <sup>+</sup> CFU-F in HF-derived samples. The switch to myofibroblast-like phenotype in HF-derived BM-MMSC indicates that cells were committed to enter disease-induced remodeling program. This assumption supported by the results presented in figure 4: in HF samples we have detected the significant upregulation of signaling pathways that regulate tissue remodeling, scar formation and maturation, synthesis of ECM components, remodeling enzymes and adhesion molecules. However, the switch to myofibroblast-like phenotype and upregulation of regeneration pathways in cultured HF-derived BM-MMSC could not be unequivocally considered as a confirmation of better therapeutic potential of these cells, since common molecular mechanisms trigger both, the reparative and pathological aspects of regeneration and fibrosis, and inappropriate activation of subsequent steps in complex and coordinated process of wound healing would result in pathological functional impairment in injured tissue [33]. For instance, Tgf- $\beta$  signaling pathway plays important role in both wound healing and fibrosis in multiple tissue types: in the early stages of wound healing Tgf- $\beta$  promotes fibroblast to myofibroblast conversion and directly upregulates collagen synthesis via activation of the Smad signaling pathways [33, 51]. Because of that, it is important to identify tissue- and disease-specific mechanisms that selectively promote the regenerative/anti-fibrotic activity of “bi-potential” signaling pathways, and learn how to control the activity of this signaling. In this regard we decided to test if there are any alterations in regulation of NP system in HF-derived BM-MMSC. There were several reasons to suggest that NP system could be involved in regulation of anti-fibrotic/pro-fibrotic potential of BM-

MMSC in HF: first, there are the evidence on literature that BNP has a direct effect on cardiac fibroblast to inhibit fibrotic responses and prevent cardiac remodeling in pathological conditions [52]; second, it was demonstrated by the number of independent studies that NP system plays a very important role in regulation of cardiac development [39], cardiac hypertrophy and remodeling [47, 48, 52, 53]. In our work we provide the first evidence that in HF-derived BM-MMSC the activity of NPs system is downregulated (figure 5). We suggest that downregulation of NP signaling in combination with upregulation of TGF- $\beta$  signaling in BM-MMSC would result in pro-fibrotic phenotype which could make these cells non-effective for therapeutic applications. Certainly, further investigations are required to reveal the molecular mechanisms that regulate interactions between reparatory, profibrotic and antifibrotic pathways in HF-derived multipotent cells including BM-MMSC.

In the second part of our work we have demonstrated that decrease in efficiency of expansion could be markedly improved by culturing of BM-MMSC under moderate hypoxic conditions and substantial decrease in cell seeding density (figure 6). In general, our data are in a good accordance with previous records indicating that the seeding density affects proliferative activity of the BM-MMSC sample [18, 54-56]. Furthermore, there are data, demonstrating that clonal seeding in combination with strong hypoxia (pO<sub>2</sub>=1%) results in increase of efficiency of MMSC expansion *in vitro* due to prevention of early onset of replicative senescence [54]. However, there is still no generally accepted opinion on molecular mechanisms that drive these effects. We have made an attempt to reveal some aspects of these mechanisms. We have mentioned above that the decline in proliferative activity could indicate that cells either enter the state of replicative senescence [28, 29] or they just stop growing and begin to differentiate [30]. Therefore, in order to achieve the stabilization of proliferative activity it is necessary to prevent the onset of cellular senescence and the spontaneous differentiation during expansion *in vitro*. In our experiments the reduction in seeding density resulted in increase of proliferative activity of BM-MMSC samples accompanied by considerable decrease in frequency of myofibroblast-like CD146<sup>+</sup>/SMA $\alpha$ <sup>+</sup> cells in culture (figure 6). We suggest that the low seeding density promotes predominantly the expansion of clonogenic CD146<sup>+</sup>/SMA $\alpha$ <sup>-</sup> (“fast”) SFU-Fs, while “slow” myofibroblast-like CD146<sup>+</sup>/SMA $\alpha$ <sup>+</sup> cells do not proliferate at these conditions, and would even die since non-clonogenic/differentiated cells need cell-to-cell contacts to survive *in vitro* [28]. The role of further increase of efficiency of BM-MMSC expansion under

moderate hypoxia in our culture system remains unclear and deserves additional detailed investigations. We hypothesize that several factors might contribute to this effect. First, moderate hypoxia could prevent spontaneous BM-MMSC-to-myofibroblast differentiation in our cultures, as it was demonstrated for rat skin and cardiac fibroblasts [59, 60]. Second, hypoxia can decelerate premature conversion to senescence via either down-regulation of p21 [54], or mTOR inhibition [61, 62]. It is interesting to note that all these factors could be in a good agreement. There are evidence that p21 is a key signaling mediator that regulates the oxygen-promoted fibroblasts to myofibroblasts differentiation [63, 64]. The role of mTOR in irreversible loss of replicative potential is well documented and discussed [61], and hypoxia-induced inhibition of mTOR may explain why hypoxia stimulates proliferative potential in BM-MMSC.

Conclusions: in present work we have found that HF-derived BM-MMSC demonstrate early decrease of proliferative activity and upregulation of genes that control both, regeneration and fibrosis. We assume that these effects are related to increase of frequency of myofibroblast-like CD146+/SMA $\alpha$ + CFU-F in HF samples, but low seeding density in combination with hypoxia resulted in predominant purification and expansion of CD146+/SMA $\alpha$ - CFU-Fs and prevented the loss replicative potential. Further experiments are necessary to learn how to manipulate the culturing conditions in order to predict and, most importantly,

control the balance between proliferation rate, replicative senescence, regenerative potential, pro-fibrotic and anti-fibrotic properties of cellular sample intended for experimental or therapeutic protocols.

## MATERIALS AND METHODS

Ethics statement. The research was conducted according to the principles stated in the Declaration of Helsinki. The samples were collected under agreement of the Institutional Ethics Committee at Federal Almazov Medical Research Centre. All patients and donors entering the program agreed to and signed an institutional review board-approved statement of informed consent.

Donors. BM-MMSCs were isolated from bone marrow aspirates of healthy donors and patients enrolled in the Studies Investigating Co-morbidities Aggravating Heart Failure (SICA-HF). A total of 10 healthy adult donors, 16 patients with chronic heart failure were enrolled. All patients were diagnosed as having CHF based on clinical signs of heart failure and echocardiographic or angiographic evidence of impaired left ventricular systolic function, and have a disease history of at least 12 months. Patients had no diabetes and no anti-diabetic treatment or history of diabetes. The clinical diagnosis of HF was evidenced by at least one of the following: (1) left ventricular ejection fraction  $\leq$ 40%; (2) left atrial dimension  $>$ 4.0 cm; or (3) N-terminal pro-B-type natriuretic peptide  $>$ 47.3 pM/L. Biochemical, clinical and demographic data are presented in Table 1.

**Table 1. Biochemical, clinical, and demographic data of the study population**

|                                                                                         | HEALTHY DONORS (n=10) | HEART FAILURE (n=16) |
|-----------------------------------------------------------------------------------------|-----------------------|----------------------|
| Age, years                                                                              | 42.7 $\pm$ 3          | 54.4 $\pm$ 4.5**     |
| BMI, kg/m <sup>2</sup>                                                                  | 27.3 $\pm$ 2          | 26 $\pm$ 1.3         |
| NYHA class                                                                              | N/A                   | II - IV              |
| NT-proBNP, pM/L                                                                         | 0.0                   | 67 $\pm$ 21**        |
| proANP, nM/L                                                                            | 0.83 $\pm$ 0.2        | 9.5 $\pm$ 0.8*       |
| Ejection fraction (%)                                                                   | N/A                   | 32 $\pm$ 3           |
| Glucose, mM/L                                                                           | 5.3 $\pm$ 0.16        | 5.06 $\pm$ 0.02      |
| Insuline, pM/L                                                                          | 68 $\pm$ 20           | 59.5 $\pm$ 31        |
| HbA1c(%)                                                                                | N/A                   | 5.9 $\pm$ 0.2        |
| Total cholesterol, mM/L                                                                 | 5.2 $\pm$ 0.4         | 5.1 $\pm$ 0.4        |
| Values are presented as mean $\pm$ SEM; *p<0.001; **p<0.05.<br>N/A – data not available |                       |                      |



Bone marrow derived cell cultures (BM-MMSC). BM aspirates were obtained from the iliac crest or sternum. Standard BM-MMSC cultures were established from plastic adherent BM cell fractions as described elsewhere, with some modifications [29]. Density gradient was used in the isolation procedure to eliminate unwanted cell types that were present in the marrow aspirate. A portion of cells isolated from the density interface (bone marrow mononuclear cells, BMMC) was used in CFU assay to estimate a frequency of colony forming units (CFU, see below) in each sample. The remaining cells were suspended and plated immediately in T75 flasks in culture medium at a density of about 3000 cells/cm<sup>2</sup> of surface area for expansion and culture. HSC and non-adherent cells were removed with changes in medium. This initial passage of the primary cell culture was referred as a passage 0 (P0). Experimental culturing conditions were 3000 and 100 cells/cm<sup>2</sup> of surface area then hypoxic conditions (Multi incubator MCO- 18M (SANYO, Japan), the concentration of CO<sub>2</sub> and O<sub>2</sub> to 5 %) and normoxia (the concentration of CO<sub>2</sub> 5 % and O<sub>2</sub> 20%).

Calculation of the number of cumulative population doublings (PD) and the time of PD. The most convenient parameter for documentation of long-term culture is counting of the number of cell passages, however, the normalization of results only to passage numbers may lead to deceptive conclusions. In this respect, calculation of in vitro PD is more accurate [57, 58]. The initial MSC number in BMMC sample can only be estimated by accounting colony-forming unit (CFU) frequency based on the assumption that every colony has been derived from a single clonogenic cell. CFU in BMMC was estimated as described [28]. Briefly, cell suspension was serially diluted two-fold across the 6 columns of 96-well plates, resulting in columns containing from 20000 to 625 cells per well. After 10-14 days of culture the number of positive and negative wells was determined for each cell concentration and CFU frequency in initial BMMC or ASC population was calculated. Thereafter, cell number was determined at all passages and time of PD and number of cumulative PD was calculated.

Limiting dilution assay for CFU-F determination. Determination of frequency of colony forming units (CFU-F) in BM-MMSC samples was performed at subsequent passages: cell suspension was serially diluted two-folds across the 8 columns of 96-well plates, resulting in columns containing from 50 to 0,39 cells per well. After 10 days of culture, the number of positive and negative wells was determined for each cell

concentration and CFU-F frequency in BM-MMSC population was calculated as described [28].

Senescence assay. Senescence-associated  $\beta$ -galactosidase activity was used as biomarker for assessing replicative senescence in MSC according to manufacturer instructions (Sigma, C S0030-1KT).

Flow cytometry. Cells were analyzed for hematopoietic lineage cells markers CD34, CD19, CD45 and for stromal cell-associated markers CD105, CD90, CD73, CD166 and CD146 by using directly conjugated phycoerythrin (PE), fluorescein isothiocyanate (FITC) or allophycocyanin (APC) antibodies (Becton-Dickinson BioSciences, San Jose, CA, USA) on a Guava EasyCyte 8 using ExpressPro software.

Stimulation of adipogenesis. Adipogenesis was induced by replacing the culture media with adipocyte induction medium composed of culture medium supplemented with 1 $\mu$ M of insulin, 1  $\mu$ M of dexamethasone and 1  $\mu$ M of IBMX. Cells were maintained in culture for up to 14 days, and adipocyte differentiation was determined by Oil Red staining after fixation in 4% PFA.

Stimulation of Osteogenesis. Osteogenesis was induced by replacing the culture medium with osteogenic induction medium composed of culture medium supplemented with 10 mM  $\beta$ -glycerophosphate, 10 nM dexamethasone, 50  $\mu$ g/ml sodium ascorbate 2-phosphate. Cultures were maintained in culture for 21 days. Then cultures were rinsed in PBS, fixed in 70% ethanol, and osteogenic differentiation was determined by staining for calcium phosphate with Alizarin red.

RNA isolation and real-time PCR analysis. Total RNA was isolated using Aurum Total RNA Mini Kit (Bio-Rad, cat #732-6820). RNA quality was verified using RNA LabChip Kit (Agilent, RNA 6000 Nano) and concentration measured with a NanoDrop ND-1000 spectrophotometer (Thermo Scientific). One microgram of total RNA was converted to cDNA using RevertAid First Strand Synthesis Kit (Thermo Scientific, K1621) and RT2 First Strand Kit (SABiosciences, cat #330401). The level of specific transcripts was assessed using RT2 Profiler PCR Array Human Fibrosis (SABiosciences, cat #PAHS-120) according to the manufacturer's protocols. Confirmation of RT2 Profiler PCR Array was performed by Q-PCR analysis using TaqMan Gene Expression Assays (Applied Biosystems, cat #4331182). All PCR reactions were performed using 7500 Real-Time PCR System (Applied Biosystems). RT2 Profiler PCR Array data were analyzed using RT2 Profiler Array Data Analysis Version 3.5 Software. RT-

RCR data were analyzed using comparative  $\Delta\Delta C_t$  method. If not specified, GAPDH used as endogenous reference.

**Statistical analysis.** The proliferative activity at different conditions was analyzed using statistical Kaplan-Meier method. Log-rank test was performed to determine the difference between two groups. The one-way analysis of variance (ANOVA) was used to determine whether there are significant differences between the means of three or more groups (GraphPad Prism version 6 for Windows). Results are expressed as mean  $\pm$  S.E. Values considered to be statistically different when  $p < 0.05$ .

## ACKNOWLEDGEMENTS

This work was supported by the European Commission under the 7th Framework Programme (grant agreement 241558, SICA-HF) and by the Ministry of Education and Science of the Russian Federation (grant RFMEFI61014X0001); we thank our colleagues Drs. Kozlova S.N., Sazonova Yu. V., Goodkova A. Ya. for excellent organization of the patients recruitment; we thank Dr. D.V. Motorin for collecting of bone marrow samples, and Dr. I. Minullina for performing RT2-PCR assays and helpful discussions.

## Conflict of interest statement

The authors have no conflict of interests to declare.

## REFERENCES

1. Roeder GS, Bailis JM. The pachytene checkpoint. Trends. 1. Shabbir A, Zisa D, Suzuki G, and Lee T. Heart failure therapy mediated by the trophic activities of bone marrow mesenchymal stem cells: a noninvasive therapeutic regimen. *Am. J. Physiol. Heart Circ. Physiol.* 2009; 296:1888–1897.
2. Trachtenberg B, Velazquez DL, Williams AR, McNiece I, Fishman J, Nguyen K, Rouy D, Altman P, Schwarz R, Mendizabal A, Oskouei B, Byrnes J, Soto V et al. Rationale and design of the Transendocardial Injection of Autologous Human Cells (bone marrow or mesenchymal) in Chronic Ischemic Left Ventricular Dysfunction and Heart Failure Secondary to Myocardial Infarction (TAC-HFT) trial: A randomized, double-blind. *Am. Heart J.* 2011; 161:487–493.
3. Mishra PK Bone marrow-derived mesenchymal stem cells for treatment of heart failure: is it all paracrine actions and immunomodulation? *J. Cardiovasc. Med. (Hagerstown).* 2008; 9: 122–128.
4. Hatzistergos KE, Quevedo H, Oskouei BN, Hu Q, Feigenbaum GS, Margitich IS, Mazhari R, Boyle AJ, Zambrano JP, Rodriguez JE, Dulce R, Pattany PM, Valdes D et al. Bone marrow mesenchymal stem cells stimulate cardiac stem cell proliferation and differentiation. *Circ. Res.* 2010; 107:913–922.
5. Miyahara Y, Nagaya N, Kataoka M, Yanagawa B, Tanaka K, Hao H, Ishino K, Ishida H, Shimizu T, Kangawa K, Sano S, Okano T, Kitamura S, et. al. Monolayered mesenchymal stem cells repair scarred myocardium after myocardial infarction. *Nat. Med.* 2006; 12:459–465.
6. Quevedo HC, Hatzistergos KE, Oskouei BN, Feigenbaum GS, Rodriguez JE, Valdes D, Pattany PM, Zambrano JP, Hu Q, McNiece I, Heldman AW, Hare JM. Allogeneic mesenchymal stem cells restore cardiac function in chronic ischemic cardiomyopathy via trilineage differentiating capacity. *Proc. Natl. Acad. Sci. U. S. A.* 2009; 106: 14022–14027.
7. Hare JM, Traverse JH, Henry TD, Dib N, Strumpf RK, Schulman SP, Gerstenblith G, DeMaria AN, Denktas AE, Gammon RS, Hermiller JB, Reisman MA, Schaer GL et al. A randomized, double-blind, placebo-controlled, dose-escalation study of intravenous adult human mesenchymal stem cells (prochymal) after acute myocardial infarction. *J. Am. Coll. Cardiol.* 2009; 54:2277–2286.
8. Heldman AW, Zambrano JP, Hare JM. Cell therapy for heart disease: where are we in 2011? *J. Am. Coll. Cardiol.* 2011; 57:466–468.
9. Karpov AA, Uspenskaya YK, Minasian SM, Puzanov MV, Dmitrieva RI, Bilibina AA, Anisimov SV, Galagudza MM. The effect of bone marrow- and adipose tissue-derived mesenchymal stem cell transplantation on myocardial remodelling in the rat model of ischaemic heart failure. *Int. J. Exp. Pathol.* 2013; 94:169–177.
10. Segers VFM, Lee RT. Stem-cell therapy for cardiac disease. *Nature* 2008; 451:937–942.
11. Angert D, Houser SR. Stem cell therapy for heart failure. *Curr. Treat. Options Cardiovasc. Med.* 2009; 11:316–327.
12. Dominici M, Le Blanc K, Mueller I, Slaper-Cortenbach I, Marini F, Krause D, Deans R, Keating A, Prockop D, Horwitz E. Minimal criteria for defining multipotent mesenchymal stromal cells. The International Society for Cellular Therapy position statement. *Cytotherapy.* 2006; 8:315–317.
13. Giordano A, Galderisi U, Marino IR. From the laboratory bench to the patient's bedside: an update on clinical trials with mesenchymal stem cells. *J. Cell. Physiol.* 2007; 211:27–35.
14. Preda MB, Valen G. Evaluation of gene and cell-based therapies for cardiac regeneration. *Curr. Stem Cell Res.* 2013; 8:304–312.
15. Amado LC, Saliaris AP, Schuleri KH, St John M, Xie JS, Cattaneo S, Durand DJ, Fitton T, Kuang JQ, Stewart G, Lehrke S, Baumgartner WW, Martin BJ, Heldman AW, Hare JM. Cardiac repair with intramyocardial injection of allogeneic mesenchymal stem cells after myocardial infarction. *Proc. Natl. Acad. Sci. U. S. A.* 2005; 102:11474–11479.
16. Shabbir A, Zisa D, Leiker M, Johnston C, Lin H, Lee T. Muscular dystrophy therapy by nonautologous mesenchymal stem cells: muscle regeneration without immunosuppression and inflammation. *Transplantation.* 2009; 87:1275–1282.
17. Tyndall A, Walker UA, Cope A, Dazzi F, De Bari C, Fibbe W, Guiducci S, Jones S, Jorgensen C, Le Blanc K, Luyten F, McGonagle D, Martin I et al. Immunomodulatory properties of mesenchymal stem cells: a review based on an interdisciplinary meeting held at the Kennedy Institute of Rheumatology Division, London, UK, 31 October 2005. *Arthritis Res. Ther.* 2007; 9:301.
18. Fossett E, Khan WS, Longo UG, Smitham PJ. Effect of age and gender on cell proliferation and cell surface characterization of synovial fat pad derived mesenchymal stem cells. *J. Orthop. Res.* 2012; 7:1013–1018.

19. Zhuo Y, Li SH, Chen MS, Wu J, Kinkaid HYM, Fazel S, Weisel RD, Li RK. Aging impairs the angiogenic response to ischemic injury and the activity of implanted cells: combined consequences for cell therapy in older recipients. *J. Thorac. Cardiovasc. Surg.* 2010; 139:1286–1294.
20. Fan M, Chen W, Liu W, Du GQ, Jiang SL, Tian WC, Sun L, Li RK, Tian H. The effect of age on the efficacy of human mesenchymal stem cell transplantation after a myocardial infarction. *Rejuvenation Res.* 2010; 13:429–438.
21. Wong CY, Chaudhry SI, Desai MM, Krumholz HM. Trends in comorbidity, disability, and polypharmacy in heart failure. *Am. J. Med.* 2011;124:136–143.
22. Wagner W, Bork S, Horn P, Krunic D, Walenda T, Diehlmann A, Benes V, Blake J, Huber FX, Eckstein V, Boukamp P, Ho AD. Aging and replicative senescence have related effects on human stem and progenitor cells. *PLoS One.* 2009; 4:5846.
23. Stolzing A, Jones E, McGonagle D, Scutt A. Age-related changes in human bone marrow-derived mesenchymal stem cells: consequences for cell therapies. *Mech. Ageing Dev.* 2008; 129:163–173.
24. Bork S, Pfister S, Witt H, Horn P, Korn B, Ho AD, Wagner W. DNA methylation pattern changes upon long-term culture and aging of human mesenchymal stromal cells. *Aging Cell.* 2010; 9:54–63.
25. Albiero M, Poncina N, Tjwa M, Ciciliot S, Menegazzo L, Ceolotto G, Vigili de Kreutzenberg S, Moura R, Giorgio M, Pelicci P, Avogaro A, Fadini GP. Diabetes causes bone marrow autonomic neuropathy and impairs stem cell mobilization via dysregulated p66Shc and Sirt1. *Diabetes.* 2014; 63:1353–1365.
26. Yiu KH, Tse HF. Specific role of impaired glucose metabolism and diabetes mellitus in endothelial progenitor cell characteristics and function. *Arterioscler. Thromb. Vasc. Biol.* 2014; 34:1136–1143.
27. Minullina IR, Alexeyeva NP, Anisimov SV, Puzanov MV, Kozlova SN, Sviryaev YV, Zaritskey AY, Shlyakhto EV. Transcriptional changes in bone marrow stromal cells of patients with heart failure. *Cell Cycle.* 2014; 13:1495–1500.
28. P Bianco, Robey PG, Simmons PJ. Mesenchymal stem cells: revisiting history, concepts, and assays. *Cell Stem Cell* 2008; 2:313–319.
29. Dmitrieva RI, Minullina IR, Bilibina AA, Tarasova OV, Anisimov SV, Zaritskey AY. Bone marrow- and subcutaneous adipose tissue-derived mesenchymal stem cells: differences and similarities *Cell Cycle* 2012; 11:377–383.
30. Berridge MJ. *Cell Signalling Biology: Module 8 – Development.* *Biochem. J.* 2012; 1–58.
31. Caplan AL. All MSCs are pericytes? *Cell Stem Cell* 2008; 3:229–230.
32. Maxson S, Lopez EA, Yoo D, Danilkovitch-Miagkova A, Leroux MA. Concise review: role of mesenchymal stem cells in wound repair. *Stem Cells Transl. Med.* 2012; 1:142–9.
33. Czubryt MP. Common threads in cardiac fibrosis, infarct scar formation, and wound healing. *Fibrogenesis Tissue Repair.* 2012; 5:19.
34. Hinz B. Formation and function of the myofibroblast during tissue repair. *J. Invest. Dermatol.* 2007;127(3):526–537.
35. Ngo M, Müller A, Li Y, Neumann S, Tian G, Dixon IMC, Arora RC, Freed DH. Human mesenchymal stem cells express a myofibroblastic phenotype in vitro: comparison to human cardiac myofibroblasts. *Mol. Cell. Biochem.* 2014; 392:187–204.
36. Crawford JR, Haudek SB, Cieslik KA, Trial J, Entman ML. Origin of developmental precursors dictates the pathophysiological role of cardiac fibroblasts. *J. Cardiovasc. Transl. Res.* 2012; 5:749–759.
37. Levin ER, Gardner DG, Samson WK. Natriuretic peptides. *N. Engl. J. Med.* 1998; 339:321–328.
38. Kishimoto I, Tokudome T, Horio T, Garbers DL, Nakao K, Kangawa K. Natriuretic Peptide Signaling via Guanylyl Cyclase (GC)-A: An Endogenous Protective Mechanism of the Heart. *Curr. Cardiol. Rev.* 2009; 5:45–51.
39. Becker JR, Chatterjee S, Robinson TY, Bennett JS, Panáková D, Galindo CL, Zhong L, Shin JT, Coy SM, Kelly AE, Roden DM, Lim CC, MacRae C. Differential activation of natriuretic peptide receptors modulates cardiomyocyte proliferation during development. *Development.* 2014; 141:335–345.
40. Knowles JW, Kim HS, Smithies O, Maeda N, Cameron V. Ventricular expression of natriuretic peptides in Npr1(-/-) mice with cardiac hypertrophy and fibrosis. *Am. J. Physiol. Heart Circ. Physiol.* 2002; 283:707–714.
41. Ellmers LJ, Scott NJ, Piihola J, Maeda N, Smithies O, Frampton CM, Richards M, Cameron V. Npr1-regulated gene pathways contributing to cardiac hypertrophy and fibrosis. *J. Mol. Endocrinol.* 2007; 38:245–257.
42. Miyashita K, Itoh H, Tsujimoto H, Tamura N, Fukunaga Y, Sone M, Yamahara K, Taura D, Inuzuka M, Sonoyama T, Nakao K. Natriuretic peptides/cGMP/cGMP-Dependent protein kinase cascades promote muscle mitochondrial biogenesis and prevent obesity. *Diabetes.* 2009; 58:2880–2892.
43. Biemann C, Rignault-Clerc S, Liaudet L, Waeber B, Feihl F, Rosenblatt N. O232: A new role of the brain natriuretic peptide in the heart: Modulation of cardiac precursor cell proliferation and differentiation. *Arch. Cardiovasc. Dis. Suppl.* 2014; 6:47.
44. Nakatsuji H, Maeda N, Hibuse T, Hiuge A, Hirata A, Kuroda Y, Kishida K, Kihara S, Funahashi T, Shimomura I. Reciprocal regulation of natriuretic peptide receptors by insulin in adipose cells. *Biochem. Biophys. Res. Commun.* 2010; 392:100–105.
45. Potter LR. Natriuretic peptide metabolism, clearance and degradation. *FEBS J.* 2011; 278:1808–1817.
46. Potter LR, Abbey-Hosch S, Dickey DM. Natriuretic peptides, their receptors, and cyclic guanosine monophosphate-dependent signaling functions. *Endocr. Rev.* 2006; 27:47–72.
47. Del Ry S, Cabiati M, Lionetti V, Emdin M, Recchia F, Giannessi D. Expression of C-type natriuretic peptide and of its receptor NPR-B in normal and failing heart. *Peptides.* 2008; 29:2208–2215.
48. Del Ry S. C-type natriuretic peptide: a new cardiac mediator. *Peptides.* 2013; 40:93–98.
49. Tsunoda K, Mendelsohn FA, Sexton PM, Chai SY, Hodsman GP, Johnston C. Decreased atrial natriuretic peptide binding in renal medulla in rats with chronic heart failure. *Circ. Res.* 1988; 62:155–161.
50. Buravkova LB, Andreeva ER, Gogvadze V, Zhivotovsky B. Mesenchymal stem cells and hypoxia: Where are we? *Mitochondrion.* 2014; 19:105–112.
51. Dobaczewski M, Bujak M, Li N, Gonzalez-Quesada N, Mendoza LH, Wang XF, Frangogiannis NG. Smad3 signaling critically regulates fibroblast phenotype and function in healing myocardial infarction. *Circ. Res.* 2010; 107:418–428.
52. Kapoun AM, Liang F, O'Young G, Damm DL, Quon D, White RT, Munson K, Lam A, Schreiner GF, Protter A. B-type natriuretic peptide exerts broad functional opposition to transforming

growth factor-beta in primary human cardiac fibroblasts: fibrosis, myofibroblast conversion, proliferation, and inflammation. *Circ. Res.* 2004; 94:453–461.

53. Calvieri C, Rubattu S, Volpe M. Molecular mechanisms underlying cardiac antihypertrophic and antifibrotic effects of natriuretic peptides. *J. Mol. Med. (Berl)*. 2012; 90:5–13.

54. Tsai CC, Chen YJ, Yew TL, Chen LL, Wang JY, Chiu CH, Hung SC. Hypoxia inhibits senescence and maintains mesenchymal stem cell properties through down-regulation of E2A-p21 by HIF-TWIST. *Blood*. 2011; 117:459–469.

55. Both SK, van der Muijsenberg AJC, van Blitterswijk CA, de Boer J, de Bruijn JD. A rapid and efficient method for expansion of human mesenchymal stem cells. *Tissue Eng.* 2007; 13:3–9.

56. Colter DC, Class R, DiGirolamo CM, Prockop DJ. Rapid expansion of recycling stem cells in cultures of plastic-adherent cells from human bone marrow. *Proc. Natl. Acad. Sci. U. S. A.* 2000; 97:3213–3218.

57. Wagner W, Horn P, Castoldi M, Diehlmann A, Bork S, Saffrich R, Benes V, Blake J, Pfister S, Eckstein, Ho AD. Replicative senescence of mesenchymal stem cells: a continuous and organized process. *PLoS One*. 2008; 3:2213.

58. Gronthos S, Zannettino ACW, Hay SJ, Shi S, Graves SE, Kortessidis A, Simmons PJ. Molecular and cellular characterisation of highly purified stromal stem cells derived from human bone marrow. *J. Cell Sci.* 2003; 116:1827–1835.

59. Sen CK and Roy S. Oxygenation state as a driver of myofibroblast differentiation and wound contraction: hypoxia impairs wound closure. *J. Invest Dermatol.* . 2010; 130:2701–2703.

60. Modarressi A, Pietramaggiori G, Godbout C, Vigato E, Pittet B, Hinz B. Hypoxia impairs skin myofibroblast differentiation and function. *J. Invest. Dermatol.* 2010; 130:2818–2827.

61. Leontieva OV and Blagosklonny MV. Hypoxia and gerosuppression: the mTOR saga continues. *Cell Cycle*. 2012; 11:3926–3931.

62. Leontieva OV, Natarajan V, Demidenko ZN, Burdelya LG, Gudkov AV, and Blagosklonny MV. Hypoxia suppresses conversion from proliferative arrest to cellular senescence. *Proc. Natl. Acad. Sci. U. S. A.* 2012; 109:13314–13318.

63. Roy S, Khanna S, Bickerstaff AA, Subramanian SV, Atalay M, Bierl M, Pendyala S, Levy D, Sharma N, Venojarvi M, Strauch A, Orosz CG, Sen CK. Oxygen Sensing by Primary Cardiac Fibroblasts: A Key Role of p21Waf1/Cip1/Sdi1. *Circ. Res.* 2003; 92:264–271.

64. Roy S, Khanna S, Rink T, Radtke J, Williams WT, Biswas S, Schnitt R, Strauch AR and Sen CK. p21 waf1 / cip1 / sdi1 as a Central Regulator of Inducible Smooth Muscle Actin Expression and Differentiation of Cardiac Fibroblasts to Myofibroblasts. 2007; 18:4837–4846.
